# Supplementary material for: Clinical handover communication at maternity shift changes and women's safety in Banjul, the Gambia: a mixed-methods study
Source: Springer Nature journal article supplement (doi:10.1186/s12884-022-05052-9), 2022-10-21
Supplement: MOESM2 [file 23628858]

Additional File 2: Data Observation Tool

# Observation of Maternity Handover CONFIDENTIAL

Date: .....

Day of week: Sun Mon Tues Wed Thu Fri Sat

Time of handover: .....

Duration (minutes): .....

Location of handover: .....

Hospital: .....

|                                   |  |                                                  |  |
|-----------------------------------|--|--------------------------------------------------|--|
| No. of patients handed over       |  | No. of patients on ward                          |  |
| No. of patients high-risk on ward |  | No. of patients with critical conditions on ward |  |
| No. of staff present              |  | No. of staff on ward                             |  |

Job titles of Health care professionals present:

|                                         | Please Circle: | Additional comments: |
|-----------------------------------------|----------------|----------------------|
| Handover delayed                        | YES/NO/NA      |                      |
| Emergency during handover               | YES/NO/NA      |                      |
| Lead nominated (job role)               | YES/NO/NA      |                      |
| Information repeated to ensure accuracy | YES/NO/NA      |                      |
| Access to lab results, notes, intranet  | YES/NO/NA      |                      |

Communication method: Verbal Face-to-face / Verbal Phone / Written only / Mixed Verbal-Written

If handover notes provided: Handwritten / Electronic / Other

Any other comments:

Answer with Y/N unless otherwise indicated

| Patient number                              | 1                                       | 2 | 3 | 4 | 5 |
|---------------------------------------------|-----------------------------------------|---|---|---|---|
| Patient is in active labour                 |                                         |   |   |   |   |
| Patient is high risk*                       |                                         |   |   |   |   |
| Reason for admission (Labour/Observation)** |                                         |   |   |   |   |
| <b>Situation</b>                            | Woman's name                            |   |   |   |   |
|                                             | Woman's age                             |   |   |   |   |
|                                             | Gravidity/Parity                        |   |   |   |   |
|                                             | Gestation                               |   |   |   |   |
|                                             | Leading consultant/nurse indentified    |   |   |   |   |
|                                             | Patient Location                        |   |   |   |   |
|                                             | Vital Signs                             |   |   |   |   |
|                                             | Resuscitation Status                    |   |   |   |   |
|                                             | Specific concerns                       |   |   |   |   |
|                                             | Key patient values/needs                |   |   |   |   |
|                                             | <b>Total /10</b>                        |   |   |   |   |
| <b>Background</b>                           | Date of admission                       |   |   |   |   |
|                                             | Present chief complaint                 |   |   |   |   |
|                                             | Diagnosis/ active problems              |   |   |   |   |
|                                             | Brief history                           |   |   |   |   |
|                                             | Current Medications                     |   |   |   |   |
|                                             | Allergies                               |   |   |   |   |
|                                             | Laboratory Results                      |   |   |   |   |
|                                             | Physical examination results            |   |   |   |   |
|                                             | Progress during admission               |   |   |   |   |
|                                             | Response to treatment                   |   |   |   |   |
|                                             | Other information from charts           |   |   |   |   |
| <b>Total /11</b>                            |                                         |   |   |   |   |
| <b>Assessment</b>                           | Clinical impression                     |   |   |   |   |
|                                             | Critical assessment of situation        |   |   |   |   |
|                                             | Expression of concerns/problems         |   |   |   |   |
|                                             | <b>Total /3</b>                         |   |   |   |   |
| <b>Recommendations</b>                      | Management plan                         |   |   |   |   |
|                                             | Suggestions on requests/ tests          |   |   |   |   |
|                                             | Suggestions on time frame               |   |   |   |   |
|                                             | Critical management features recognised |   |   |   |   |
|                                             | <b>Total /4</b>                         |   |   |   |   |
| Global Comment ***                          |                                         |   |   |   |   |
| Distractions/Interruptions                  |                                         |   |   |   |   |
| Confidentiality maintained                  |                                         |   |   |   |   |
| Questions asked                             |                                         |   |   |   |   |
| Written notes provided                      |                                         |   |   |   |   |
| Standardised medical terminology            |                                         |   |   |   |   |

\*Please complete reason for high-risk

\*\* Please answer as follows L=Labour O=Observation

\*\*\*Specific comment require
