# Supplementary material for: Clinical handover communication at maternity shift changes and women's safety in Banjul, the Gambia: a mixed-methods study
Source: Springer Nature journal article supplement (doi:10.1186/s12884-022-05052-9), 2022-10-21

**Additional File 4: Graph showing spread of observations across days of week, hospitals and shift changes**

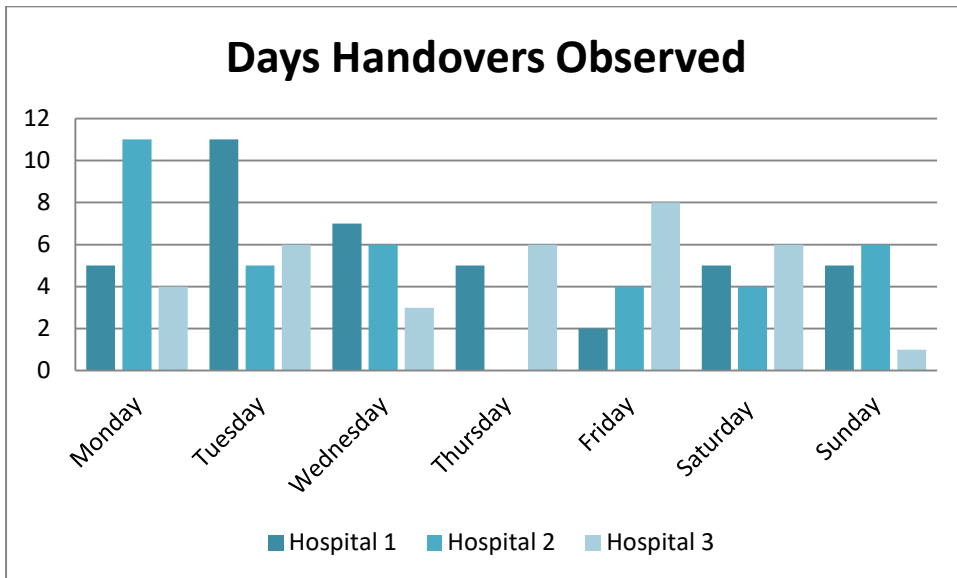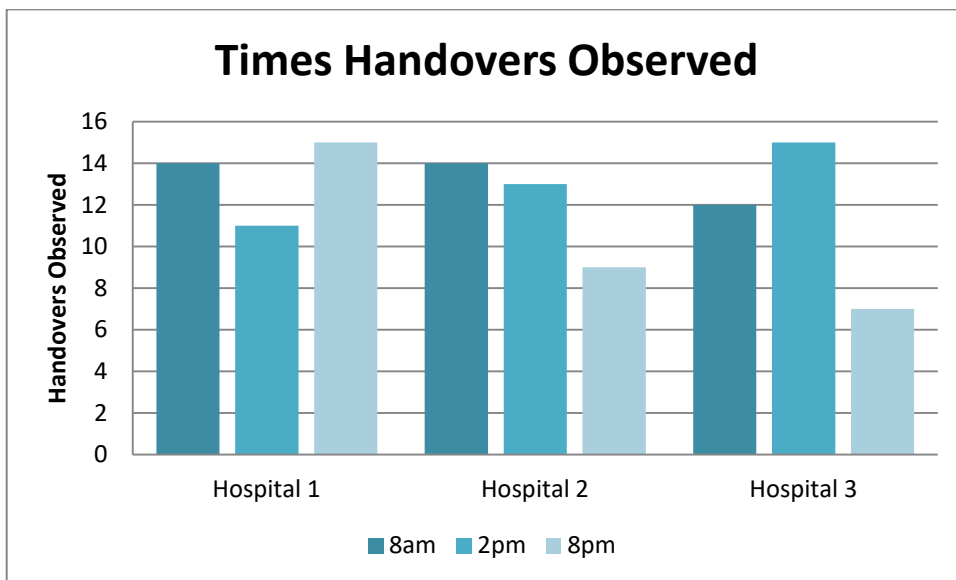

Supplement: MOESM4 [file 23628858]
