# Supplementary material for: Clinical handover communication at maternity shift changes and women's safety in Banjul, the Gambia: a mixed-methods study
Source: Springer Nature journal article supplement (doi:10.1186/s12884-022-05052-9), 2022-10-21
Supplement: MOESM5 [file 23628858]

**Additional File 5: Table of total SBAR items discussed at handover**

**Table of median number of SBAR items included in all handovers**

|                                                | <b>Total<br/>(28 items)</b> | <b>Situation (10<br/>items)</b> | <b>Background<br/>(11 items)</b> | <b>Assessment<br/>(3 items)</b> | <b>Recommendations<br/>(4 items)</b> |
|------------------------------------------------|-----------------------------|---------------------------------|----------------------------------|---------------------------------|--------------------------------------|
| <b>Items included<br/>median (IQR)</b>         | 6 (5-9)                     | 3 (3-4)                         | 2 (1-4)                          | 1 (1-1)                         | 0 (0-1)                              |
| <b>Minimum</b>                                 | 2                           | 1                               | 0                                | 0                               | 0                                    |
| <b>Maximum</b>                                 | 22                          | 7                               | 9                                | 3                               | 4                                    |
| <b>No items<br/>included<br/>frequency (%)</b> | 0 (0)                       | 0 (0)                           | 77 (11.6)                        | 298 (44.7)                      | 351 (52.7)                           |
| <b>All items included<br/>frequency (%)</b>    | 0 (0)                       | 0 (0)                           | 0 (0)                            | 46 (6.9)                        | 21 (3.2)                             |
