# Supplementary material for: Clinical handover communication at maternity shift changes and women's safety in Banjul, the Gambia: a mixed-methods study
Source: Springer Nature journal article supplement (doi:10.1186/s12884-022-05052-9), 2022-10-21
Supplement: MOESM6 [file 23628858]

**Additional File 6: Table of high-risk and obstetric emergency conditions observed**

Table displaying high-risk conditions and obstetric emergencies as defined by NICE Intrapartum Care for Healthy Women and Babies Guideline and WHO that were identified during observation of handovers

| <b>High-Risk Conditions</b>            | <b>Frequency of high-risk conditions (%)<br/>n=280*</b> |
|----------------------------------------|---------------------------------------------------------|
| Pre-eclampsia                          | 63 (22.5)                                               |
| Previous Caesarean Section             | 25 (8.9)                                                |
| Eclampsia                              | 24 (8.6)                                                |
| Prolonged second stage of labour       | 19 (6.8)                                                |
| Pregnancy induced hypertension         | 17 (6.1)                                                |
| Multiple birth                         | 17 (6.1)                                                |
| Anaemia                                | 16 (5.7)                                                |
| Intrauterine foetal distress           | 14 (5)                                                  |
| Postpartum haemorrhage                 | 13 (4.6)                                                |
| Abruption                              | 12 (4.3)                                                |
| Induction of labour                    | 7 (2.5)                                                 |
| Antepartum Haemorrhage                 | 7 (2.5)                                                 |
| Septic caesarean wound                 | 7 (2.5)                                                 |
| Parity >4                              | 6 (2.1)                                                 |
| Placenta praevia                       | 6 (2.1)                                                 |
| Malpresentation Breech/Transverse lie  | 6 (2.1)                                                 |
| Cervical cancer                        | 4 (1.4)                                                 |
| Preterm labour                         | 3 (1.1)                                                 |
| Cardiac disease/hypertensive disorders | 3 (1.1)                                                 |
| Previous unexplained stillbirth        | 2 (0.7)                                                 |
| Prolapse of cord                       | 2 (0.7)                                                 |
| Poly/oligohydraminos                   | 1 (0.4)                                                 |
| Previous ectopic                       | 1 (0.4)                                                 |
| Malaria                                | 1 (0.4)                                                 |
| Sickle cell                            | 1 (0.4)                                                 |
| Diabetes                               | 1 (0.4)                                                 |
| Attempted suicide                      | 1 (0.4)                                                 |
| Prolonged third stage of labour        | 1 (0.4)                                                 |

\*14 women had multiple high-risk conditions and are included twice - 266 individual women had high-risk conditions
