# Supplementary material for: Clinical handover communication at maternity shift changes and women's safety in Banjul, the Gambia: a mixed-methods study
Source: Springer Nature journal article supplement (doi:10.1186/s12884-022-05052-9), 2022-10-21
Supplement: MOESM7 [file 23628858]

**Additional File 7: Table of characteristics of participants in SSIs and FDGs****Demographics of participants in SSIs and FDGs**

| <b>Characteristic</b>                   | <b>Categories</b> | <b>Number of Participants<br/>n= 30</b> |
|-----------------------------------------|-------------------|-----------------------------------------|
| <b>Age</b>                              | 25 and under      | 3                                       |
|                                         | 26-35             | 17                                      |
|                                         | 36-45             | 7                                       |
|                                         | 46-55             | 2                                       |
|                                         | 56 and over       | 1                                       |
| <b>Gender</b>                           | Male              | 10                                      |
|                                         | Female            | 20                                      |
| <b>Profession</b>                       | Doctor            | 8                                       |
|                                         | Midwife           | 13                                      |
|                                         | Nurse             | 9                                       |
| <b>Years of clinical<br/>experience</b> | 0-5               | 15                                      |
|                                         | 6-10              | 5                                       |
|                                         | 11-20             | 8                                       |
|                                         | 21 and over       | 2                                       |
| <b>Religion</b>                         | Muslim            | 25                                      |
|                                         | Christian         | 5                                       |
| <b>Ethnic group/ tribe</b>              | Mandinka          | 10                                      |
|                                         | Fula              | 8                                       |
|                                         | Wolof             | 3                                       |
|                                         | Manjago           | 3                                       |
|                                         | Other             | 6                                       |
